# Supplementary figures and images for: Effect of Germination on the Avenanthramide Content of Oats and Their in Vitro Antisensitivity Activities
Source: MDPI journal article supplement (doi:10.3390/molecules27196167), 2022-09-20

# Supplementary Figure S1

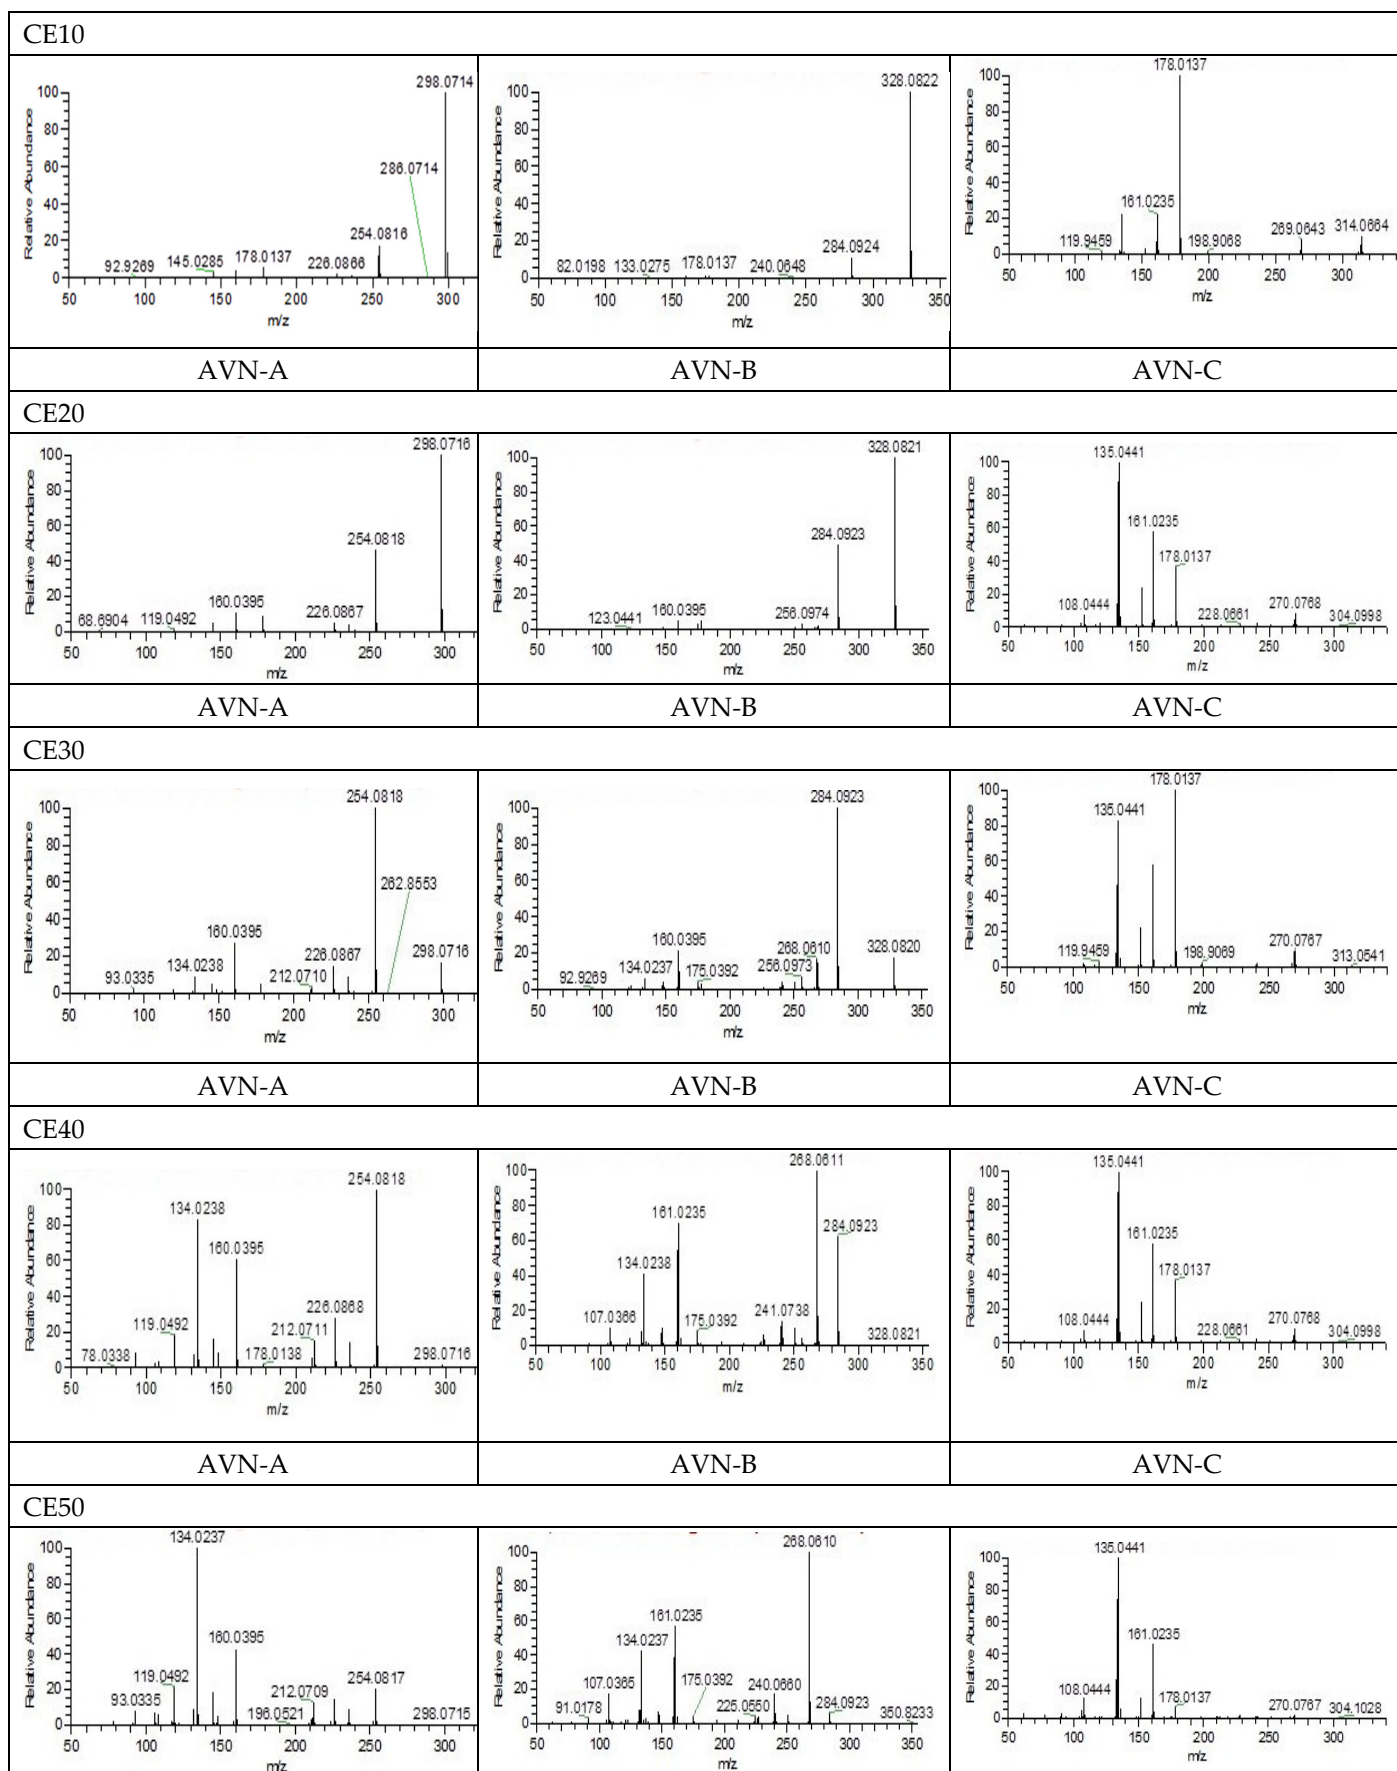

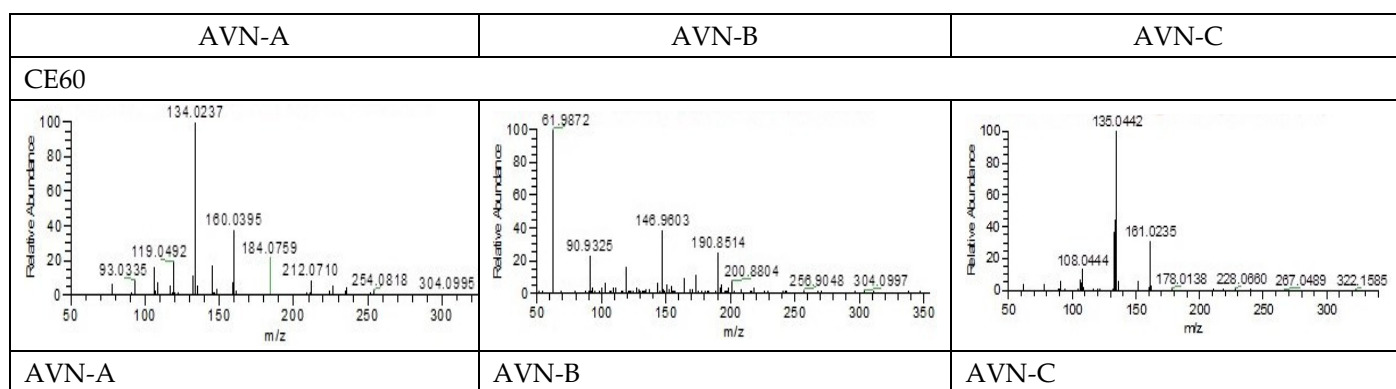

**Figure S1.** Optimize collision energy—Anthracem ion mass spectrometry.

Supplement: s1 [file s1]
